# Supplementary material for: Oct4 confers stemness and radioresistance to head and neck squamous cell carcinoma by regulating the homologous recombination factors PSMC3IP and RAD54L
Source: PubMed Central journal article supplement (PMC8211562; doi:10.1038/s41388-021-01842-1), 2021-06-02
Supplement: 41388_2021_1842_MOESM1_ESM.pdf [file 41388_2021_1842_MOESM1_ESM.pdf]

## 1 **Supplementary Information**

### 2 **Supplementary results**

#### 3 **Oct4 isoforms are differentially expressed in HNSCC cell lines**

4           Due to alternative splicing and alternative translation initiation, the *POU5F1* gene can  
5 be transcribed into at least three different transcript variants (TV), which in turn are translated  
6 into four protein isoforms (Supplementary Figure 1A) [1]. The expression of the different Oct4  
7 isoforms was analyzed in a set of seven established HNSCC cell lines including Cal33,  
8 FaDu, SAT, SAS, UTSCC5, UTSCC8 and XF354. mRNA expression of Oct4 isoform A was  
9 found in all seven HNSCC cell lines, whereas Oct4 B and Oct4 B1 mRNA could only be  
10 detected in four out of seven cell lines (Figure 1A). The *in vitro* mRNA expression levels of  
11 Oct4 isoforms vary considerably between the HNSCC cell lines. While the UTSCC5 cell line  
12 shows an approximately four-fold higher expression of Oct4 isoform A than any other cell  
13 line, only very low amounts of Oct4 A mRNA could be detected in SAT, SAS and FaDu.  
14 Interestingly, western blot analysis revealed that protein levels detected by anti-Oct4  
15 antibodies might not reflect well the Oct4 isoform mRNA levels of HNSCC cell lines  
16 (Supplementary Figure 1B). A similar discrepancy has already been reported in other tumor  
17 entities [1]. In contrast to the qPCR primers designed in this study, commercially available  
18 Oct4 antibodies often fail to distinguish different isoforms as well as discriminate Oct4 from  
19 other very similar homologs, such as protein product of the *POU5F1B* gene [2, 3].  
20 Additionally, the observed discrepancy could be explained by the tightly controlled  
21 expression regulation of transcription factors both at mRNA and protein levels [4-6]. In this  
22 study, we employed the HNSCC cell lines Cal33 and UTSCC5, which show high mRNA  
23 levels as well as protein levels detectable by Oct4 antibody (Supplementary Figure 1B).

24

#### 25 **CRISPR/Cas9-mediated knockout of Oct4 isoform A**

26 Taking into account the transient effect of siRNA-mediated gene silencing, we established a  
27 stable model system allowing the analysis of single-isoform depletion. Using the  
28 CRISPR/Cas9 system, we generated UTSCC5 cells with a genomic knockout (KO) of the

29 pluripotency-related isoform Oct4 A (Supplementary Figure 4 A). To achieve that, insertion or  
30 deletion (Indel) mutations were introduced into exon 1 of the POU5F1 gene, which is  
31 exclusively present in the Oct4 isoform A. These mutations resulted in mRNA with frameshift  
32 sequence, whereas the mRNA expression levels of all Oct4 isoforms in the KO clones were  
33 not significantly different from the expression levels in two out of three wild type controls  
34 (Supplementary Figure 4 B). Exons commonly present in other isoforms, as Oct4 2b, were  
35 not targeted. Three complete Oct4 A knockout clones (KO) were selected for further  
36 analyses, along with three wild type (WT) clones that underwent the same procedure but did  
37 not have any sequence alterations (Supplementary Figure 4 A).

38

### 39 **Potential adaptation of UTSCC5 KO cells to the long-term Oct4 depletion**

40 Interestingly, basal mRNA expression of ATR was higher in the Oct4 A KO clone than in the  
41 WT clone (Supplementary Figure 5C). Moreover, in the Oct4 A KO cells we observed a trend  
42 towards higher protein levels and increased phosphorylation of CHK1 (Supplementary Figure  
43 5D), which is a downstream target of ATR signaling [2], as compared to the WT cells. These  
44 results could be explained by a potential adaptation of UTSCC5 KO cells to the long-term  
45 Oct4 depletion by deregulation of the DNA repair pathways, suggesting that long-term KO  
46 models adapt to missing Oct4 by deregulation of the DNA repair pathways.

47

### 48 **Correlation of *POU5F1*, *RAD54L* and *PSMC3IP* expression with genomic instability and** 49 **HPV16 status**

50 By analyzing the TCGA HNSCC gene expression dataset, we found that *POU5F1*,  
51 *PSMC3IP*, and *RAD54L* are associated with a high fraction genome altered (FGA) index,  
52 which is an indicator of genomic instability (Supplementary Figure 9A). It is driven by many  
53 factors, including genetic mutations, epigenetic alterations, changes in the tumor  
54 microenvironment, and HPV16 infection [3, 4]. Previous studies showed that HPV16  
55 oncoprotein E7 also activates the Oct4 promoter and increases Oct4 gene expression in  
56 HNSCC and cervical carcinoma suggesting potential mechanisms for HPV16-mediated CSC

57 formation and tumor initiation [5, 6]. That study also found that in cervical carcinoma, Oct4  
58 induces proliferation and migration in HPV negative cells whereas inhibits it in HPV positive  
59 cells [6]. Our finding indicates significant correlation of HPV positivity and low expression of  
60 Oct4 protein at the invasive front (n = 166), although the fraction of HPV positive tumors is  
61 low (n = 28) (Supplementary Table 1).

62 Using the TCGA HNSCC gene expression dataset, we confirmed increased expression  
63 levels of *POU5F1*, *PSMC3IP*, and *RAD54L* in HPV16 DNA-positive tumors (Supplementary  
64 Figure 9B). Of note, the significant association of high DNA repair gene expression with  
65 better survival can also be found in HPV16 DNA-negative HNSCC (Supplementary Figure  
66 9C). Similar to our observations, previous clinical studies also demonstrated that high  
67 expression of DNA repair genes is associated with homology repair deficiency, and could be  
68 used to predict a better response to DNA toxic treatments [7, 8]. These studies suggested  
69 that high expression of these genes might reflect not a function, but an attempt to  
70 compensate for a defective DNA repair pathway. Furthermore, increased expression of  
71 specific DNA repair genes might antagonize homology recombination and lead to increased  
72 DNA damage after radiotherapy by disrupting the tight regulation required for efficient DNA  
73 repair [8, 9]. Most importantly, these studies provided evidence that high expression levels of  
74 DNA repair genes might be used to predict high tumor sensitivity to DNA-damaging therapies  
75 [8].

76

## 77 **Supplementary methods**

### 78 **Cell lines and culture conditions**

79 The *in vitro* experiments were performed on the HPV-negative HNSCC cell lines Cal33  
80 (DMSZ, Germany), FaDu (ATCC, USA) UTSCC5 and UTSCC8 (both Prof. Reidar Grenman,  
81 University of Turku, Finland), XF354 (DKFZ tumor bank, Heidelberg, Germany), SAS and  
82 SAT (both JCRB Cell Bank, Osaka, Japan). Cell line identity was confirmed using PCR-  
83 single-locus-technology by Eurofins Genomics. All HNSCC cell lines were cultured in  
84 Dulbecco's Modified Eagle Medium (DMEM) with high glucose (4500 mg/L) (Sigma-Aldrich)

85 supplemented with 10% FBS, 1 mM L-glutamine, 1% HEPES solution and 1% MEM non-  
86 essential amino acids (all from Sigma-Aldrich) at 37 °C and 5% CO<sub>2</sub> in a humidified  
87 incubator. NCCIT cells used for chromatin immunoprecipitation analysis were purchased  
88 from ATCC® and maintained in RPMI medium (PAN-Biotech) with all supplements listed  
89 above. Mycoplasma free status was confirmed regularly.

90

### 91 **Immunohistochemical staining of Oct-4 and p16**

92 Sections of Formalin-fixed paraffin-embedded (FFPE) primary tumor samples were  
93 deparaffinized and antigen retrieval was conducted as described previously [10] with minor  
94 modifications. After antigen retrieval (pH 6; Dako) for 35 min at 630 W, sections were  
95 incubated with polyclonal rabbit anti-human Oct4-antibody (dilution 1:100; ab18976, Abcam,  
96 Cambridge, UK) for 30 min at room temperature. Negative control slides were incubated with  
97 corresponding rabbit antibody control (Dako). Blinded samples were semiquantitatively  
98 evaluated by two independent observers. Nuclear Oct4 staining was assessed in the whole  
99 tumor specimen and its invasive front, and patients were grouped into high, intermediate and  
100 low Oct4 expression subgroup based on the staining intensity.

101 For immunohistochemical staining of p16, the CINtec histology kit (Roche mtm laboratories  
102 AG, Basel, CH) was used according to the instructions of the manufacturer and as described  
103 previously [11]. Intense staining of at least 70% of the tumour cells was defined as positive  
104 staining.

105 Curves depicting loco-regional control were estimated by the Kaplan-Meier method in the  
106 Statistical Package for the Social Sciences (SPSS) v25 software. Statistical significance was  
107 calculated with the log-rank test.

108

### 109 **DNA extraction and HPV genotyping**

110 DNA extraction and PCR-array based HPV DNA genotyping were performed as described in  
111 [11]. Briefly, 5 µm FFPE sections were subjected to DNA extraction using the QIAamp DNA  
112 FFPE tissue kit (Qiagen GmbH, Hilden, DE) according to the instructions of the

113 manufacturer. HPV DNA analyses including determination of the genotype were performed  
114 using the LCD-Array HPV 3.5 kit (CHIPRON GmbH, Berlin, DE) as reported in [11].

115

### 116 **Radiobiological colony formation assay (CFA)**

117 For analyses of clonogenic cell survival after irradiation, cells were seeded in triplicates into  
118 6-well-plates at a density of 250-2000 cells/well depending on the cell line and treatment.  
119 After attachment of the cells, irradiation was performed with doses of 2, 4 and 6 Gy of X-rays.  
120 In case of treatment with PARP inhibitor Olaparib, irradiation was performed 2h after addition  
121 of 1  $\mu$ mol Olaparib. Sham irradiated plates were used as controls. After irradiation, cells were  
122 kept for 8 to 14 days, until colonies reached a sufficient size corresponding to more than 50  
123 cells. Cells were fixed and stained with crystal violet (Sigma-Aldrich). Counting of colonies  
124 was performed manually.

125 For 3D-CFA, cells were plated into ultra-low attachment 96-well plates (Corning) at a density  
126 of 500 cells/well, immersed in a 0.5 mg/ml Matrigel (Corning) DMEM solution. For each  
127 condition, 5 technical repeats were plated. 24 h after seeding, an equal amount of medium  
128 was added on top of the Matrigel and cells were irradiated as described above. Fixation was  
129 performed 8 to 9 days after irradiation by addition of 10% formaldehyde (VWR International)  
130 into the medium. Colonies were counted manually. Statistical significance of the difference  
131 between cell survival curves was determined in SPSS v25 using stratified linear regression to  
132 fit the data into the linear-quadratic formula  $S(D)/S(0) = \exp(\alpha D + \beta D^2)$ , as described by  
133 Franken and colleagues [12]. p values < 0.05 were considered statistically significant.

134

### 135 **Sphere formation assay**

136 After harvesting, cells were washed once with PBS and then resuspended to single cells in  
137 Mammary Epithelial Cell Growth Medium (MEBM) (Lonza) supplemented with B27  
138 (Invitrogen), 4  $\mu$ g/ml insulin and 1 mM L-glutamine (both Sigma-Aldrich), 20 ng/ml epidermal  
139 growth factor (EGF) and 20 ng/ml basic fibroblast growth factor (FGF) (both Peprotech). 2000  
140 cells/well were plated into 24-well ultra-low attachment plates (Corning) in triplicates. Four

141 days later, additional 500  $\mu$ l MEBM per well were added and cell clumps were disintegrated  
142 by pipetting. Plates were scanned automatically 7 to 13 days after plating using the Celigo S  
143 Imaging Cell Cytometer (Brooks). Spheres were discriminated from cell aggregates by a  
144 diameter  $\geq$  50  $\mu$ m and a roundish shape. Sphere size was determined from images  
145 employing the Fiji/ImageJ software [13].

146

#### 147 **siRNA-mediated knockdown**

148 For knockdown of the Oct4 isoforms A and B as well as PSMC3IP and RAD54L, cells were  
149 seeded at a density of  $2 \times 10^5$  to  $3 \times 10^5$  cells/well into 6-well plates with complete DMEM  
150 medium. On the next day, cells were transfected with 12  $\mu$ l Lipofectamine RNAi MAX  
151 (Invitrogen) according to manufacturer's instructions. For Oct4 isoform knockdown, single  
152 siRNA and control non-specific scrambled siRNA were used at a concentration of 150  
153 pmol/well. With the help of the siDESIGN Center online tool (Horizon Discovery), siRNA were  
154 designed to target either Oct4 isoform A or B without affecting Oct4 pseudogene expression.  
155 siRNA oligonucleotides were synthesized by Eurofins. siRNA sequences are provided in  
156 Supplementary Table 2. Knockdown of PSMC3IP and RAD54L was performed using 100  
157 pg/well of Smartpool siRNA purchased from Dharmacon. Scrambled smartpool siRNA was  
158 used as control. Cells were harvested and plated for further assays 24 h or 48 h after  
159 transfection with PSMC3IP and RAD54L siRNA or Oct4 isoform siRNA, respectively. For  
160 time course analysis of target gene expression after Oct4 knockdown, samples were  
161 collected 8 h, 12 h, 24 h and 48 h after start of transfection. Efficacy of the knockdown was  
162 validated by RT-qPCR and Western Blot. Gene expression analysis for Cal33, FaDu and  
163 UTSCC5 cells transfected either with Oct4 siRNA (total) or scrambled siRNA was performed  
164 using GPL20844 Agilent-072363 SurePrint G3 Human GE v3 8x60K Microarray 039494.  
165 Samples were prepared and arrays were processed using standard Agilent protocols as  
166 described earlier [14]. Data deposition: all data are MIAME compliant and the raw data have  
167 been deposited in the Gene Expression Omnibus (GEO) database, accession no  
168 GSE173161.

169

## 170 **Oct4 overexpression**

171 Cal33-tdTomato and Cal33-Oct4-HA-tdTomato cell lines were generated via transfection of  
172 Cal33 with pWPXL-tdTomato and pWPXL-Oct4-HA-tdTomato plasmids, followed by two  
173 rounds of FACS. In the first round, cells expressing tdTomato were separated from non-  
174 transfected population and two weeks later the second sorting was performed to separate  
175 the stable population from cells that were only transiently transfected and already lost  
176 tdTomato expression.

177

## 178 **RNA Isolation, cDNA Synthesis and qPCR**

179 Total RNA isolation was performed with the RNeasy Plus Mini Kit (Qiagen GmbH, Hilden,  
180 Germany) according to manufacturer`s instructions. Then, cDNA was synthesized using the  
181 PrimeScript™ RT reagent Kit (Takara Bio). For each sample, an additional reaction without  
182 reverse transcriptase (RT) enzyme was conducted and pooled minus-RT samples were used  
183 as controls for qPCR. qPCR was performed using TB Green Premix Ex Taq II (Tli RNase H  
184 Plus) (Takara Bio) according to manufacturer`s protocol in the StepOnePlus™ Real-Time  
185 PCR System (Applied Biosystems). Primer sequences are provided in Supplementary Table  
186 2. qPCR reactions were conducted in three technical replicates and mean values were  
187 normalized to the housekeeping genes  $\beta$ -Actin, RPLP0 or GAPDH. Gene expression  
188 analysis of 83 DNA repair genes was performed with the RT<sup>2</sup> Profiler PCR Array Human  
189 DNA Repair (Qiagen, #PAHS-042Z) according to the manufacturer's instructions. For RT<sup>2</sup>  
190 profiling, equal quantities of RNA from three independent repeats were used. Results for  
191 ATR, BRCA1 and BRCA2 were validated with qPCR of the independent repeats.

192

## 193 **Protein isolation and Western Blot**

194 For protein isolation, cells were washed twice with PBS and lysed with RIPA buffer (Fischer  
195 Scientific, Waltham, Massachusetts) supplemented with complete inhibitor (Roche),  
196 proteinase and phosphatase inhibitor (Fisher Scientific). Lysates were centrifuged for 10

197 minutes at 10,000 rpm, 4°C to remove cell debris. Afterwards, total protein concentration was  
198 determined using the Pierce™ BCA Protein Assay kit (Fisher Scientific) according to the  
199 manufacturer's instructions. Next, protein lysates were mixed with 4x loading buffer and  
200 heated to 95°C for five minutes. 10 µg or higher of total protein along with a molecular weight  
201 marker (Fisher Scientific) were loaded onto a 4-12 % gradient polyacrylamide gel (Invitrogen)  
202 and proteins were separated for approximately 90 minutes at 120 V in a Cell Sure Lock™  
203 electrophoresis cell containing 1x NuPAGE™ running buffer (both Invitrogen). Next, proteins  
204 were blotted onto a Amersham™ Protran® 0.2 µm nitrocellulose membrane (Sigma-Aldrich) by  
205 wet transfer at 100 V for 90 minutes using NuPAGE™ transfer buffer (Fisher Scientific,) in a  
206 cooled Mini-PROTEAN® 3 transfer tank (Bio-Rad). After transfer, membranes were washed  
207 with 1x PBS with 0.1% Triton X-100 (PBS-T) and blocked with 5 % BSA in PBS-T for 1 hour  
208 at room temperature. Next, incubation with the primary antibody was performed overnight at  
209 +4°C. Primary antibodies were diluted as 1:1000 in 5 % BSA in PBS-T. Secondary antibodies  
210 were diluted as 1:10000 in 5 % BSA in PBS-T. The list of primary and secondary antibodies  
211 can be found in Supplementary Table 2. GAPDH was used as housekeeping protein. On the  
212 next day, primary antibodies were removed and membranes were repeatedly washed with  
213 PBS-T for at least 90 minutes. Incubation with the secondary antibody was performed for one  
214 hour at room temperature. After additional washing with PBS-T for at least two hours,  
215 membranes were incubated with SuperSignal West Dura Extended Duration Substrate kit  
216 (Fischer Scientific) or HRP Detection Reagent (GE Healthcare). Chemiluminescent signals  
217 were detected using X-ray film (Agfa).

218

### 219 **Cell cycle analysis**

220 Analysis of cell cycle distribution was performed on HNSCC cells seeded at low cell density  
221 ( $10^5$  cells/well in 6-well plate) to match the exponential growth phase. Harvested cells were  
222 washed in Flow Cytometry buffer (1x DPBS, 1 mM EDTA, 25 mM HEPES, 3 % FBS, all  
223 Sigma-Aldrich) and subsequently incubated with 10 µg/ml Hoechst 33342 DNA dye  
224 (Invitrogen) diluted in Flow Cytometry buffer. After 45 minutes incubation at 37°C, the



225 reaction was stopped by placing the samples on ice. Immediately prior to analysis, 2 µg/ml of  
226 the live-dead marker 7-Aminoactinomycin (7-AAD) (Sigma-Aldrich) was added and Flow  
227 Cytometry was conducted using the BD FACSCelesta™ Flow Cytometer (BD). The  
228 subsequent data analysis was performed with FlowJo™ v10 (FlowJo LLC).

229

### 230 **γH2A.X staining**

231 For staining of γH2A.X foci, cells were plated onto 8-well Millicell® EZ chamber slides (Merck  
232 Millipore) at a density of 25 000 cells/well. Next day, cells received 4 Gy X-ray irradiation  
233 delivered by Yxlon Y.TU 320 (200 kV X-rays, dose rate 1.3 Gy/minute at 20 mA, filtered with  
234 0.5 mm Cu). Absorbed dose was measured using a Duplex dosimeter (PTW). Sham-  
235 irradiated cells were used as control. 24 h after irradiation, cells were fixed with 3.7%  
236 formaldehyde (Thermo Fisher Scientific) for 30 minutes at 37°C. After washing three times  
237 with PBS, the samples were permeabilized using 0.25% Triton X100 (Sigma-Aldrich) for  
238 seven minutes at room temperature and again washed with PBS. Next, samples were  
239 blocked with 10% BSA (Fisher Scientific) in PBS at 37°C for one hour. Incubation with the  
240 primary antibody diluted as 1:400 in 3% BSA/PBS was conducted overnight at +4°C. On the  
241 next day, samples were repeatedly washed with PBS and subsequently incubated with the  
242 secondary antibody diluted as 1:500 in 3% BSA/PBS for one hour at room temperature. After  
243 additional washing steps in PBS, nuclear staining was performed with 1 µg/ml DAPI for 5  
244 minutes. The images were taken with a confocal Leica SP5 microscope. Images were  
245 analyzed using Fiji/ImageJ [13].

246

### 247 **CRISPR/Cas9-mediated Oct4 A knockout**

248 Oct4 A KO clones were generated from the UTSCC5 cell line using the CRISPR/Cas9  
249 system. A single-guided (sg) RNA oligonucleotide duplex specifically targeting exon 1 in the  
250 Oct4 A isoform was designed with the CCTop-CRISPR/Cas9 target online predictor [15, 16],  
251 purchased from Eurofins Genomics and cloned into a pGuidelt vector plasmid (Takara Bio).  
252 Next, UTSCC5 cells were co-transfected with pGuidelt-Oct4-sgRNA plasmid and

253 pSpCas9(BB)-2A-GFP plasmid (gift from Feng Zhang, Addgene plasmid # 48138), which  
254 was additionally modified by including the high fidelity Cas9 enzyme Cas9-HF1 (gift from  
255 Aliona Bogdanova, Max Planck Institute of Molecular Cell Biology and Genetics). Then,  
256 transfected cells identified by GFP expression were sorted as single cells into the wells of a  
257 96-well plate. After sorting, cells were grown in complete DMEM for several weeks. Clones  
258 were sequenced by Eurofins Genomics to detect the presence of frameshift insertion or  
259 deletion mutations in the targeted area. For further validation, absence of intact exon 1 was  
260 confirmed with PCR using indel-sensitive primers. Primer sequences are provided in  
261 Supplementary Table 2. The presence of intact copies of the non-targeted neighbor exon 2b  
262 was used as control.

263

#### 264 **Chromatin immunoprecipitation (ChIP)**

265 ChIP experiments were conducted predominantly with the Chromatin Immunoprecipitation  
266 (ChIP) Assay Kit (Merck Millipore) according to the manufacturer's instructions. Importantly,  
267 DNA fragmentation step was performed using Micrococcal Nuclease (Cell Signaling  
268 Technology) according to the ChIP protocol of the manufacturer. In brief, when NCCIT cells  
269 reached a density of  $3 \times 10^6$  cells per 10 cm<sup>2</sup> dish, proteins were crosslinked to the DNA by  
270 incubation with 1% formaldehyde (Thermo Fisher Scientific) for 15 minutes at 37°C. Cells  
271 were collected in PBS containing protease inhibitors (1 mM PMSF, Sigma-Aldrich), 1 µg/ml  
272 aprotinin, 1 µg/ml Pepstatin A, (both Biomol) and lysed in the recommended buffer from the  
273 Cell Signaling Technology protocol. Next, nuclear DNA was fragmented by incubating nuclei  
274 with 0.125 µl Micrococcal Nuclease (Cell Signaling Technology) for 10 minutes at 37°C. After  
275 that, nuclei were transferred to SDS Lysis buffer (Merck Millipore) and following steps were  
276 performed according to the Merck Millipore ChIP protocol. Disruption of nuclei was achieved  
277 by repeatedly passing the suspension through an insulin syringe. Then, samples were  
278 incubated with primary antibody against Oct4 (Abcam, Cell signaling technology) or control  
279 IgG antibody (Cell signaling technology) overnight at 4°C. The next day, DNA-protein-  
280 antibody complexes were precipitated using Agarose beads and crosslinks were reversed at

281 65°C for 4 h. The DNA fragments were further purified using the QIAquick PCR Purification  
282 Kit (Qiagen). For qPCR detection of immunoprecipitated DNA fragments, primers were  
283 designed to cover different promotor regions of the presumable Oct4 target genes which  
284 contained putative Oct4 binding sites (predicted by Eukaryotic Promotor Database,  
285 <https://epd.epfl.ch//index.php>). Significance of DNA fragment yield after Oct4 antibody  
286 precipitation compared to control IgG was calculated using paired *t*-test.

287

### 288 **TCGA dataset analysis**

289 For analysis of the Oct4-correlating gene signature, the TCGA HNSCC provisional dataset  
290 was used (519 patients, 119 radiotherapy-treated). Oct4-correlating genes were identified  
291 with Pearson correlation analysis in the SUMO software  
292 (<https://angiogenesis.dkfz.de/oncoexpress/software/sumo/>) (5). Kaplan-Meier survival curves  
293 were generated with log-rank test employing the optimal threshold method to define the high-  
294 expression and low-expression subgroup. For evaluation of target gene co-expression with  
295 DNA repair genes, median R values were determined using Pearson correlation analysis and  
296 statistical significance was calculated by Wilcoxon signed rank test of obtained R values  
297 against R=0 (no correlation). The subsequent pathway analysis was performed with the  
298 Reactome Pathway Database (<https://reactome.org/>). Gene expression differences between  
299 tumor and normal tissue were analyzed with the Gene Expression Profiling Interactive  
300 Analysis (GEPIA) web tool [17] based on TCGA and GTx data. P values < 0.01 were  
301 considered statistical significant.

302

### 303 **Statistical analysis**

304 The results of the sphere formation assay,  $\gamma$ H2A.X assay and relative gene expression  
305 determined by qPCR were analyzed by paired two-tailed *t*-test. Statistical outliers were  
306 excluded based on Grubbs analysis (alpha 0.05). Sample sizes were generally determined  
307 based on the previous studies involving similar experimental setup. In general, at least three  
308 biological replicates of each experiment were performed.

## 309 **Supplementary discussion**

### 310 **The correlation of Oct4 expression and HPV status**

311 According to the previously published studies, the expression of Oct4 transcript might be  
312 induced by HPV16 oncoproteins suggesting a contribution of Oct4 to HPV-related  
313 tumorigenicity [5, 6]. The Oct4-mediated phenotype depends on the HPV status in cervical  
314 carcinoma: proliferation and migration were induced by Oct4 in HPV-negative cells whereas  
315 they were inhibited in HPV-positive cells [6]. Our finding indicates a significant correlation of  
316 the HPV status and low expression of Oct4 protein at the invasive front. Due to the high  
317 demand for new biomarkers, particularly for HPV-negative HNSCC, this report focuses on  
318 analyzing the role of Oct4 in the radioresistance of HPV-negative models.

### 319 **Oct4 contributes to the maintenance of CSC phenotype**

320 Allowing for efficient repair of irradiation-induced DNA double-strand breaks (DSB), an  
321 enhanced DNA damage response critically mediates CSC radioresistance via the activation  
322 of ATM and ATR kinase, cell cycle checkpoint regulators and DNA repair proteins [18, 19].  
323 Consequently, an upregulation of the homologous recombination repair (HRR) pathway is  
324 associated with increased radioresistance in HNSCC cell lines [20], and HRR deficiencies  
325 are suggested as potential therapeutic targets [21]. Similarly, improved chemotherapy  
326 response was reported in patients with HNSCC with loss-of-function mutations in the DNA  
327 damage response gene *REVL13* [22]. HNSCC CSC populations can be identified using  
328 functional characteristics like low proteasome activity [23] and enhanced ATP-binding  
329 cassette (ABC) transporter activity [24]. Oct4 has been shown to regulate the CSC  
330 phenotype in different tumor entities [25-27]. In line with these reports, HNSCC cell lines  
331 treated with siRNA against Oct4 isoforms exhibited downregulation of the hyaluronic acid  
332 receptor CD44, an established HNSCC CSC biomarker that has been associated with  
333 decreased loco-regional control in patients with HNSCC after PORT-C or primary  
334 radiotherapy [28, 29]. Previous investigations suggested that CSC-related signaling in  
335 HNSCC cells depends on the interaction of the CD44v3 with Oct4 and other stemness  
336 transcription factors [30]. We found a significant alteration of the CSC-related gene signature

337 in Oct4 knockdown HNSCC cell lines. Oct4 downregulation also affected the functional  
338 characteristics of the CSC phenotype, as shown by decreased self-renewal capacity of Cal33  
339 cells. The relevance of these *in vitro* findings for patients with HNSCC is supported by  
340 previous studies revealing an association of Oct4/CIP2A positivity with poor tumor  
341 differentiation status [31]. In addition to the effect on CSC characteristics, Cal33 cells  
342 exhibited partial radiosensitization upon Oct4 knockdown, whereas UTSCC5 cells were less  
343 affected regarding both self-renewal capacity and clonogenic survival after irradiation. In  
344 contrast to previous reports showing the different functions of Oct4 isoform A and B in  
345 stemness and stress response, neither downregulation of all Oct4 isoforms nor knockout of  
346 the stem cell-related isoform A led to significant radiosensitization of UTSCC5 cells,  
347 suggesting a cell line-specific effect [32-34]. Similar to the effect of Oct4 knockdown,  
348 overexpression of Oct4 in Cal33 cells also resulted in the accumulation of unrepaired DNA  
349 damage and significant cell radiosensitization. This finding is in line with previous  
350 observations that Oct4-dependent transcriptional regulation depends on its precise  
351 intracellular level, and both loss and gain of Oct4 expression led to the inhibition of the stem  
352 cell transcriptional program and ESC differentiation [35, 36].

353 CSCs of different tumor entities critically depend on the ATR/CHK1 signaling axis for an  
354 efficient DNA damage response, rendering them particularly sensitive towards CHK1  
355 inhibition [37-39]. Upon irradiation, CHK1/WEE1-mediated G2 arrest constitutes a crucial  
356 survival mechanism for TP53 mutant cancers cells, which lack an adequate G1 checkpoint  
357 [40, 41]. With its various functions in the DNA damage response, TP53 mutations are  
358 considered an important driver of HPV-negative HNSCC carcinogenesis, occurring in more  
359 than 70% of cases [42, 43]. In HPV-positive tumors, the function of TP53 is antagonized by  
360 the viral oncoprotein E6 [44]. Of note, all cell lines used in this report possess TP53  
361 mutations, highlighting the importance of alternative cell cycle checkpoints in our model  
362 systems. Our data demonstrated that Oct4 knockdown in UTSCC5 cells abrogates the  
363 irradiation-induced G2-arrest, which could be partially attributed to the downregulation of the  
364 Oct4-driven *CHEK-1* and *WEE1* expression.

365 Therefore, the results of our study demonstrated that Oct4 contributes to radioresistance of  
366 HNSCC by regulation of the CSC properties.

### 367 **Oct4 A knockout cells activate pro-survival mechanisms**

368 Our studies showed that Oct4 A knockout cells exhibit increased ATR expression compared  
369 to wild type cells, but failed to upregulate ATR expression upon irradiation. In addition, a  
370 trend towards higher CHK1 protein levels and increased phosphorylation was observed in  
371 Oct4 A knockout cells. As CHK1 phosphorylation is a well-established effect of activated  
372 ATR signaling [2], our findings suggest that during long-term culturing, Oct4 A knockout  
373 clones potentially acquired additional changes leading to the activation of pro-survival  
374 mechanisms.

375

## 376 **Supplementary Figures and Tables**

### 377 **Supplementary Table 1: Oct4 expression at the invasive front and HPV16 status**

#### 378 **crosstabulation**

### 379 **Supplementary Table 2: Antibodies, primers and siRNA oligonucleotides used for the**

#### 380 **study**

381

### 382 **Supplementary Figure 1. Analysis of the Oct4 expression in HNSCC cells. (A)**

383 Schematic representation of the different Oct4 transcript variants (black) and protein isoforms  
384 (blue) encoded by the *POU5F1* gene. (B) Western blot analysis in Cal33, UTSCC5, FaDu  
385 and FaDu radioresistant (RR) HNSCC cell lines and diluted samples for NCC-IT cells with  
386 and without transfection with pooled Oct4 A siRNA 1 and 2. Cells transfected with scrambled  
387 (Scr) siRNA were used as control. Proteins were detected using anti-Oct4 (Cell Signaling  
388 Technology, CST #2750) antibodies. (C) Quantitative real-time PCR (RT-qPCR) analysis of  
389 Oct4 A and Oct4 B expression in Cal33 and UTSCC5 cell lines after siRNA-mediated  
390 knockdown of Oct4 A expression; error bars indicate SD; \*-  $p < 0,05$ . Cells after Oct4 A  
391 knockdown were analyzed in the sphere forming assay depicted in Figure 1C, RT-qPCR  
392 depicted in Figure 1B and cell cycle analysis depicted in Figure 1E. (D) Expression of

393 *ALDH1A1* and *ALDH1A3* genes in HNSCC cells after Oct4 knockdown; error bars indicate  
394 SD; \*- p < 0,05.

395

396 **Supplementary Figure 2. Oct4 regulates *CHEK1* and *WEE1* expression.** (A) Oct4  
397 knockdown in HNSCC cells resulted in a downregulation of *CHEK1* and *WEE1* expression;  
398 error bars indicate SD; \*- p < 0,05. (B) Western blot analysis of Chk1 expression in Cal33,  
399 UTSCC5, FaDu and FaDu radioresistant (RR) HNSCC cell with and without transfection with  
400 pooled Oct4 A siRNA 1 and 2. Cells transfected with scrambled (Scr) siRNA were used as  
401 control. Western blot analysis for Oct4 protein is shown in Supplementary Figure 1B.  
402 Western blot analysis for GAPDH is the same as in Supplementary Figure 1B. (C) Analysis  
403 of the *CHEK1* and *WEE1* gene promoters using The Eukaryotic Promoter Database (EPD)  
404 revealed putative Oct4 binding elements.

405

406 **Supplementary Figure 3. Plating efficacy of Cal33 (A) and UTSCC5 (B) after siRNA-**  
407 **mediated knockdown of Oct4 A and Oct4 B expression.** Error bars indicate SD. Cells  
408 after Oct4 A or Oct4 B knockdown were analyzed by the radiobiological colony forming assay  
409 depicted in Figure 2B.

410

411 **Supplementary Figure 4. Characterization of HNSCC cells with deregulated Oct4**  
412 **expression levels.** (A) Schematic representation of the CRISPR/Cas9 system which has  
413 been used for Oct4 knockout (KO) generation in UT SCC5 cells. The candidate clones were  
414 checked for mutations by sequencing and validated for the absence of intact copies of Oct4A  
415 via PCR with indel sensitive primers. A PCR for non-targeted neighbor exon 2b was used as  
416 control. MaKo – monoallelic knockout with in-frame indel mutation of second allele. Wild type  
417 (WT) clones underwent the same procedure but did not have mutations in Oct4 DNA  
418 sequence. (B) Quantitative real-time PCR (RT-qPCR) analysis of Oct4 A, Oct4 B and OCT4  
419 B1 expression in UTSCC5 cell lines after introduction of the CRISPR/Cas9 – mediated  
420 frameshift mutations in Oct4 KO clones; error bars indicate SD; \*- p < 0,05. (C) Plating

421 efficacy of WT and Oct4 KO UTSCC5 cells in 2D and 3D Matrigel-based cell culture  
422 conditions; error bars indicate SD. WT and Oct4 KO UTSCC5 cells were analyzed by the  
423 radiobiological colony forming assays depicted in Figure 2C. (D) Plating efficacy of Cal33  
424 cells stably transfected with pWPXL-tdTomato or pWPXL-Oct4-HA-tdTomato plasmids.  
425 These cells were analyzed by the radiobiological colony forming assay depicted in Figure 2D;  
426 error bars indicate SD. (E) Relative mRNA expression levels in Cal33 pWPXL-Oct4-HA-  
427 tdTomato cells relatively to Cal33 pWPXL-tdTomato cells; error bars indicate SD; \* -  $p < 0,05$ .

428

429 **Supplementary Figure 5. The impact of Oct4 expression on HNSCC tumor**  
430 **radioresistance and on the properties of UTSCC5 cells with CRISPR/Cas9 mediated**  
431 **Oct4 knockout.**

432 (A) Kaplan-Meier analysis of patients with HNSCC treated with postoperative  
433 radio(chemo)therapy (PORT-C). The impact of Oct4 expression on loco-regional  
434 regional control was evaluated using the univariate Cox-regression model. Statistical  
435 analysis was performed by SPSS software. High (intensity 2) and low (intensity 0) nuclear  
436 Oct4 expression at the invasive front is associated with better loco-regional control;  $n = 167$ .  
437 (B) Plating efficacy of WT and Oct4 KO UTSCC5 cells pretreated with Olaparib at a  
438 concentration of  $1\mu\text{M}$  for 2h before irradiation. Untreated cell were used as control; error bars  
439 indicate SD; \*\* -  $p < 0,01$ , \*\*\* -  $p < 0,001$ , \*\*\*\* -  $p < 0,0001$ . Cells were analyzed by the  
440 radiobiological colony forming assays depicted in Figure 3A. (C) Expression of *ATR*, *BRCA1*  
441 and *BRCA2* genes in UTSCC5 Oct4 A KO and WT clones; error bars indicate SD; \* -  $p <$   
442  $0,05$ . (D) Western blot analysis of Chk1 and phospho-Chk1 (S296) expression in Oct4 KO  
443 and WT cells; error bars indicate SD.

444

445 **Supplementary Figure 6. Association of mRNA expression of *PSMC3IP* and *RAD54L***  
446 **genes with overall survival probability in HNSCC patients.** Association of mRNA  
447 expression of *PSMC3IP* and *RAD54L* with overall survival probability in the total HNSCC  
448 patient cohort,  $n = 517$  (A) and in the cohort of the HNSCC patients treated with



449 radiotherapy, n = 119 (B). Small variances in the patients' numbers compared to Figure 4 are  
450 due to different version of TCGA HNSCC dataset used by the different web tools.

451

452 **Supplementary Figure 7. Analysis of the signaling pathways linked to *PSMC3IP*,**  
453 ***RAD54L* and *CHEK1*.** (A) Co-expression analysis of *PSMC3IP* and *RAD54L* with *CHEK1*  
454 using HNSCC patient cohort identified the clusters of highly correlating genes. The cluster of  
455 genes highly correlating with *PSMC3IP* and *CHEK1* (B) or with *RAD54L* and *CHEK1* (C)  
456 were used for pathway analysis using the Reactome Pathway Database  
457 (<https://reactome.org/>).

458

459 **Supplementary Figure 8. Analysis of the Oct4-depedend regulation of the putative**  
460 **target genes.** (A) Analysis of the promoter regions of *PSMC3IP* and *RAD54L* genes using  
461 The Eukaryotic Promoter Database (EPD) revealed potential Oct4 binding sites. (B) qRT-  
462 PCR analysis of the gene expression levels of Oct4A and putative Oct4 target genes  
463 *PSMC3IP*, *RAD54L* and *CHEK1* in NCC-IT pluripotent embryonal carcinoma cells; error bars  
464 indicate SD. (C) qRT-PCR time-course analysis of *CHEK1*, *PSMC3IP*, and *RAD54L*  
465 expression in Oct4 siRNA transfected Cal33 cells; error bars indicate SD; \*- p < 0,05; \*\*- p <  
466 0,01.

467

468 **Supplementary Figure 9. Correlation of *POU5F1*, *RAD54L* and *PSMC3IP* expression**  
469 **with genomic instability and HPV p16 status in HNSCC patients.** (A) Correlation of  
470 fraction genome altered (FGA) index with mRNA expression of *PSMC3IP*, *RAD54L*, and  
471 *POU5F1* in the TCGA HNSCC patient cohort, n = 519. (B) Increased expression levels of  
472 *POU5F1*, *PSMC3IP*, and *RAD54L* in HPV16-positive tumors versus HPV16-negative tumors  
473 in the TCGA HNSCC patient cohort. (C) Association of low expression of DNA repair gene  
474 signature with worse survival in HPV16-negative HNSCC patients. *PSMC3IP* and *RAD54L*  
475 genes are highlighted in blue.

476

477 **Supplementary Figure 10. Quantitative real-time PCR (RT-qPCR) analysis of *PSMC3IP***  
478 **and *RAD54L* expression in Cal33 and UTSCC5 cell lines after siRNA-mediated**  
479 **knockdown.** Error bars indicate SD; \*- p < 0,05. Cells after *PSMC3IP* and *RAD54L*  
480 knockdown were analyzed by the sphere forming assay depicted in Figure 5D.

481

482 **Supplementary Figure 11. Plating efficiency of Cal33 and UTSCC5 cells after siRNA-**  
483 **mediated knockdown of *PSMC3IP* and *RAD54L* expression.** Error bars indicate SD. Cells  
484 after *PSMC3IP* and *RAD54L* knockdown were analyzed by the radiobiological colony forming  
485 assay depicted in Figure 6B.

486

487 References:

488 1 Villodre ES, Kipper FC, Pereira MB, Lenz G. Roles of OCT4 in tumorigenesis, cancer therapy  
489 resistance and prognosis. *Cancer Treat Rev* 2016; 51: 1-9.

490

491 2 Zhao H, Piwnica-Worms H. ATR-mediated checkpoint pathways regulate phosphorylation and  
492 activation of human Chk1. *Mol Cell Biol* 2001; 21: 4129-4139.

493

494 3 Akagi K, Li J, Broutian TR, Padilla-Nash H, Xiao W, Jiang B *et al.* Genome-wide analysis of HPV  
495 integration in human cancers reveals recurrent, focal genomic instability. *Genome Res* 2014;  
496 24: 185-199.

497

498 4 Korzeniewski N, Spardy N, Duensing A, Duensing S. Genomic instability and cancer: lessons  
499 learned from human papillomaviruses. *Cancer Lett* 2011; 305: 113-122.

500

501 5 Liu D, Zhou P, Zhang L, Wu G, Zheng Y, He F. Differential expression of Oct4 in HPV-positive  
502 and HPV-negative cervical cancer cells is not regulated by DNA methyltransferase 3A. *Tumour*  
503 *Biol* 2011; 32: 941-950.

504

505 6 Panayiotou T, Michael S, Zaravinos A, Demirag E, Achilleos C, Strati K. Human papillomavirus  
506 E7 binds Oct4 and regulates its activity in HPV-associated cervical cancers. *PLoS Pathog* 2020;  
507 16: e1008468.

508

509 7 Kang J, D'Andrea AD, Kozono D. A DNA repair pathway-focused score for prediction of  
510 outcomes in ovarian cancer treated with platinum-based chemotherapy. *J Natl Cancer Inst*  
511 2012; 104: 670-681.

512

- 513 8 Pitroda SP, Pashtan IM, Logan HL, Budke B, Darga TE, Weichselbaum RR *et al.* DNA repair  
514 pathway gene expression score correlates with repair proficiency and tumor sensitivity to  
515 chemotherapy. *Sci Transl Med* 2014; 6: 229ra242.
- 516  
517 9 Ciccia A, Elledge SJ. The DNA damage response: making it safe to play with knives. *Mol Cell*  
518 2010; 40: 179-204.
- 519  
520 10 Digomann D, Kurth I, Tyutyunnykova A, Chen O, Lock S, Gorodetska I *et al.* The CD98 Heavy  
521 Chain Is a Marker and Regulator of Head and Neck Squamous Cell Carcinoma  
522 Radiosensitivity. *Clin Cancer Res* 2019; 25: 3152-3163.
- 523  
524 11 Lohaus F, Linge A, Tinhofer I, Budach V, Gkika E, Stuschke M *et al.* HPV16 DNA status is a  
525 strong prognosticator of loco-regional control after postoperative radiochemotherapy of  
526 locally advanced oropharyngeal carcinoma: results from a multicentre explorative study of  
527 the German Cancer Consortium Radiation Oncology Group (DKTK-ROG). *Radiother Oncol*  
528 2014; 113: 317-323.
- 529  
530 12 Franken NA, Rodermond HM, Stap J, Haveman J, van Bree C. Clonogenic assay of cells in  
531 vitro. *Nat Protoc* 2006; 1: 2315-2319.
- 532  
533 13 Schindelin J, Arganda-Carreras I, Frise E, Kaynig V, Longair M, Pietzsch T *et al.* Fiji: an open-  
534 source platform for biological-image analysis. *Nat Methods* 2012; 9: 676-682.
- 535  
536 14 Peitzsch C, Cojoc M, Hein L, Kurth I, Mabert K, Trautmann F *et al.* An Epigenetic  
537 Reprogramming Strategy to Resensitize Radioresistant Prostate Cancer Cells. *Cancer research*  
538 2016; 76: 2637-2651.
- 539  
540 15 Labuhn M, Adams FF, Ng M, Knoess S, Schambach A, Charpentier EM *et al.* Refined sgRNA  
541 efficacy prediction improves large- and small-scale CRISPR-Cas9 applications. *Nucleic Acids*  
542 *Res* 2018; 46: 1375-1385.
- 543  
544 16 Stemmer M, Thumberger T, Del Sol Keyer M, Wittbrodt J, Mateo JL. CCTop: An Intuitive,  
545 Flexible and Reliable CRISPR/Cas9 Target Prediction Tool. *PLoS One* 2015; 10: e0124633.
- 546  
547 17 Tang Z, Li C, Kang B, Gao G, Li C, Zhang Z. GEPIA: a web server for cancer and normal gene  
548 expression profiling and interactive analyses. *Nucleic Acids Res* 2017; 45: W98-W102.
- 549  
550 18 Schulz A, Meyer F, Dubrovskaya A, Borgmann K. Cancer Stem Cells and Radioresistance: DNA  
551 Repair and Beyond. *Cancers (Basel)* 2019; 11.
- 552  
553 19 Krause M, Dubrovskaya A, Linge A, Baumann M. Cancer stem cells: Radioresistance, prediction  
554 of radiotherapy outcome and specific targets for combined treatments. *Adv Drug Deliv Rev*  
555 2017; 109: 63-73.

- 556  
557 20 Liu C, Liao K, Gross N, Wang Z, Li G, Zuo W *et al.* Homologous recombination enhances  
558 radioresistance in hypopharyngeal cancer cell line by targeting DNA damage response. *Oral*  
559 *Oncol* 2020; 100: 104469.
- 560  
561 21 Wurster S, Hennes F, Parplys AC, Seelbach JI, Mansour WY, Zielinski A *et al.* PARP1 inhibition  
562 radiosensitizes HNSCC cells deficient in homologous recombination by disabling the DNA  
563 replication fork elongation response. *Oncotarget* 2016; 7: 9732-9741.
- 564  
565 22 Huang KK, Jang KW, Kim S, Kim HS, Kim SM, Kwon HJ *et al.* Exome sequencing reveals  
566 recurrent REV3L mutations in cisplatin-resistant squamous cell carcinoma of head and neck.  
567 *Sci Rep* 2016; 6: 19552.
- 568  
569 23 Lagadec C, Vlashi E, Bhuta S, Lai C, Mischel P, Werner M *et al.* Tumor cells with low  
570 proteasome subunit expression predict overall survival in head and neck cancer patients.  
571 *BMC Cancer* 2014; 14: 152.
- 572  
573 24 Song J, Chang I, Chen Z, Kang M, Wang CY. Characterization of side populations in HNSCC:  
574 highly invasive, chemoresistant and abnormal Wnt signaling. *PLoS One* 2010; 5: e11456.
- 575  
576 25 Kumar SM, Liu S, Lu H, Zhang H, Zhang PJ, Gimotty PA *et al.* Acquired cancer stem cell  
577 phenotypes through Oct4-mediated dedifferentiation. *Oncogene* 2012; 31: 4898-4911.
- 578  
579 26 Manic G, Signore M, Sistigu A, Russo G, Corradi F, Siteni S *et al.* CHK1-targeted therapy to  
580 deplete DNA replication-stressed, p53-deficient, hyperdiploid colorectal cancer stem cells.  
581 *Gut* 2018; 67: 903-917.
- 582  
583 27 Song B, Kim DK, Shin J, Bae SH, Kim HY, Won B *et al.* OCT4 directly regulates stemness and  
584 extracellular matrix-related genes in human germ cell tumours. *Biochem Biophys Res*  
585 *Commun* 2018; 503: 1980-1986.
- 586  
587 28 de Jong MC, Pramana J, van der Wal JE, Lacko M, Peutz-Kootstra CJ, de Jong JM *et al.* CD44  
588 expression predicts local recurrence after radiotherapy in larynx cancer. *Clin Cancer Res*  
589 2010; 16: 5329-5338.
- 590  
591 29 Linge A, Lohaus F, Lock S, Nowak A, Gudziol V, Valentini C *et al.* HPV status, cancer stem cell  
592 marker expression, hypoxia gene signatures and tumour volume identify good prognosis  
593 subgroups in patients with HNSCC after primary radiochemotherapy: A multicentre  
594 retrospective study of the German Cancer Consortium Radiation Oncology Group (DKTK-  
595 ROG). *Radiother Oncol* 2016; 121: 364-373.
- 596  
597 30 Bourguignon LY, Wong G, Earle C, Chen L. Hyaluronan-CD44v3 interaction with Oct4-Sox2-  
598 Nanog promotes miR-302 expression leading to self-renewal, clonal formation, and cisplatin  
599 resistance in cancer stem cells from head and neck squamous cell carcinoma. *J Biol Chem*  
600 2012; 287: 32800-32824.

- 601  
602 31 Ventela S, Sittig E, Mannermaa L, Makela JA, Kulmala J, Loyttyneimi E *et al.* CIP2A is an Oct4  
603 target gene involved in head and neck squamous cell cancer oncogenicity and  
604 radioresistance. *Oncotarget* 2015; 6: 144-158.
- 605  
606 32 Gao Y, Wei J, Han J, Wang X, Su G, Zhao Y *et al.* The novel function of OCT4B isoform-265 in  
607 genotoxic stress. *Stem Cells* 2012; 30: 665-672.
- 608  
609 33 Wang X, Zhao Y, Xiao Z, Chen B, Wei Z, Wang B *et al.* Alternative translation of OCT4 by an  
610 internal ribosome entry site and its novel function in stress response. *Stem Cells* 2009; 27:  
611 1265-1275.
- 612  
613 34 Xiao M, Liu L, Zhang S, Yang X, Wang Y. Cancer stem cell biomarkers for head and neck  
614 squamous cell carcinoma: A bioinformatic analysis. *Oncol Rep* 2018; 40: 3843-3851.
- 615  
616 35 Hammachi F, Morrison GM, Sharov AA, Livigni A, Narayan S, Papapetrou EP *et al.*  
617 Transcriptional activation by Oct4 is sufficient for the maintenance and induction of  
618 pluripotency. *Cell Rep* 2012; 1: 99-109.
- 619  
620 36 Niwa H, Miyazaki J, Smith AG. Quantitative expression of Oct-3/4 defines differentiation,  
621 dedifferentiation or self-renewal of ES cells. *Nat Genet* 2000; 24: 372-376.
- 622  
623 37 Bartucci M, Svensson S, Romania P, Dattilo R, Patrizii M, Signore M *et al.* Therapeutic  
624 targeting of Chk1 in NSCLC stem cells during chemotherapy. *Cell Death Differ* 2012; 19: 768-  
625 778.
- 626  
627 38 Meng L, Hu H, Zhi H, Liu Y, Shi F, Zhang L *et al.* OCT4B regulates p53 and p16 pathway genes  
628 to prevent apoptosis of breast cancer cells. *Oncol Lett* 2018; 16: 522-528.
- 629  
630 39 Venkatesha VA, Parsels LA, Parsels JD, Zhao L, Zabudoff SD, Simeone DM *et al.* Sensitization  
631 of pancreatic cancer stem cells to gemcitabine by Chk1 inhibition. *Neoplasia* 2012; 14: 519-  
632 525.
- 633  
634 40 Bridges KA, Hirai H, Buser CA, Brooks C, Liu H, Buchholz TA *et al.* MK-1775, a novel Wee1  
635 kinase inhibitor, radiosensitizes p53-defective human tumor cells. *Clin Cancer Res* 2011; 17:  
636 5638-5648.
- 637  
638 41 Koniaras K, Cuddihy AR, Christopoulos H, Hogg A, O'Connell MJ. Inhibition of Chk1-  
639 dependent G2 DNA damage checkpoint radiosensitizes p53 mutant human cells. *Oncogene*  
640 2001; 20: 7453-7463.
- 641  
642 42 Zhou G, Liu Z, Myers JN. TP53 Mutations in Head and Neck Squamous Cell Carcinoma and  
643 Their Impact on Disease Progression and Treatment Response. *J Cell Biochem* 2016; 117:  
644 2682-2692.

645  
646 43 Leemans CR, Snijders PJF, Brakenhoff RH. The molecular landscape of head and neck cancer.  
647 *Nat Rev Cancer* 2018; 18: 269-282.

648  
649 44 Leemans CR, Braakhuis BJ, Brakenhoff RH. The molecular biology of head and neck cancer.  
650 *Nat Rev Cancer* 2011; 11: 9-22.

651

652
