# Supplementary material for: Oct4 confers stemness and radioresistance to head and neck squamous cell carcinoma by regulating the homologous recombination factors PSMC3IP and RAD54L
Source: PubMed Central journal article supplement (PMC8211562; doi:10.1038/s41388-021-01842-1), 2021-06-02

# Supplementary Figure 7

**A**

- Genes included in the pathway analysis
- Whole genome

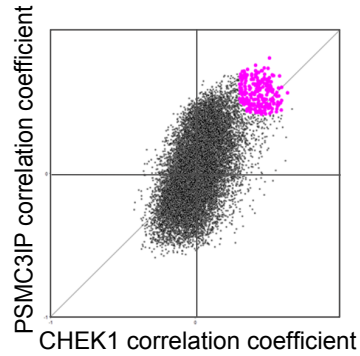

- Genes included in the pathway analysis
- Whole genome

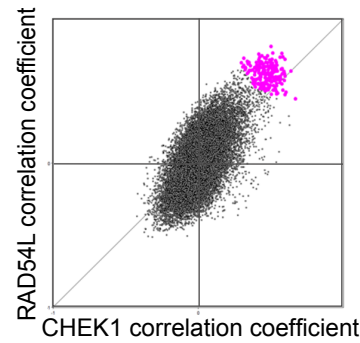

**B**

## PSMC3IP and CHEK1 correlating genes

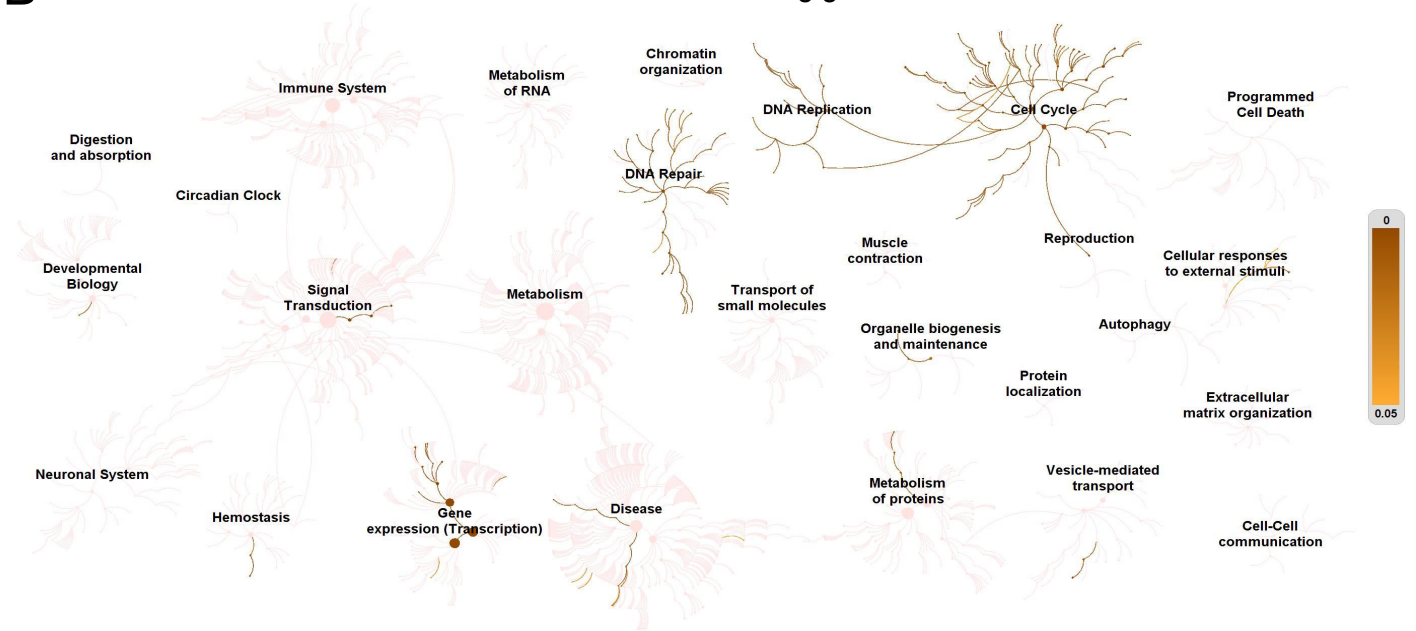

**C**

## RAD54L and CHEK1 correlating genes

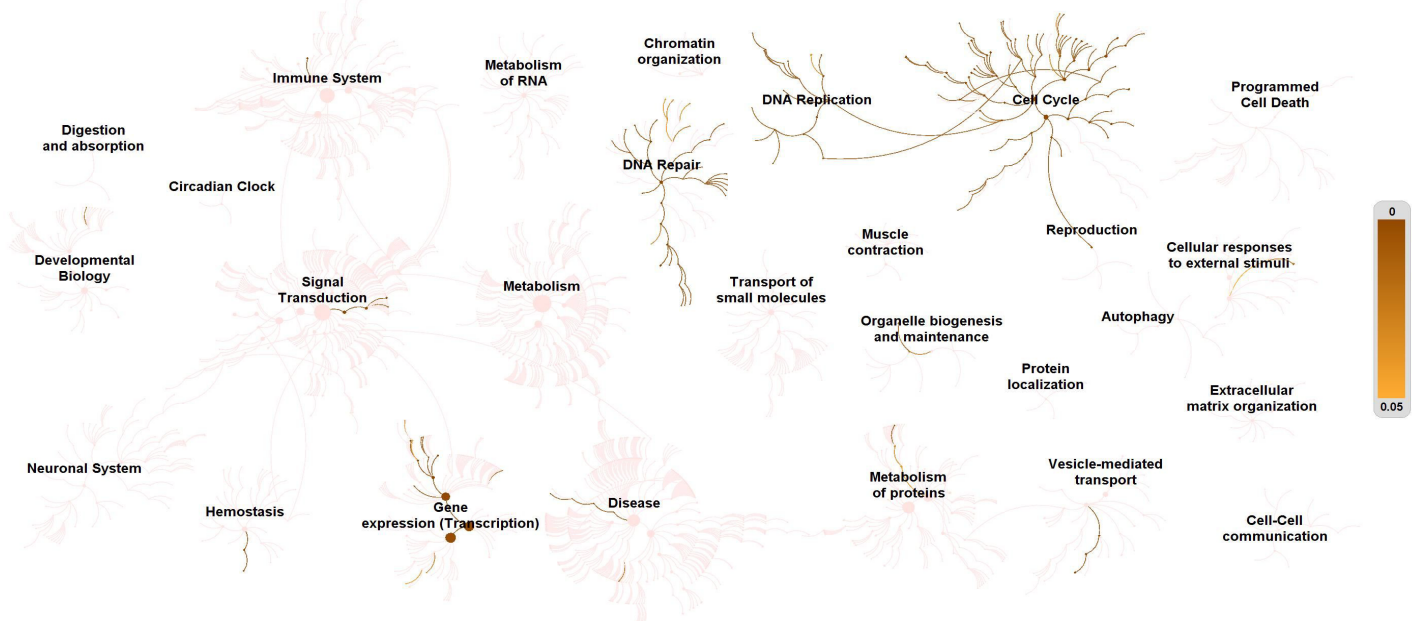

Supplement: 41388_2021_1842_MOESM10_ESM.pdf [file 41388_2021_1842_MOESM10_ESM.pdf]
