# Supplementary material for: Oct4 confers stemness and radioresistance to head and neck squamous cell carcinoma by regulating the homologous recombination factors PSMC3IP and RAD54L
Source: PubMed Central journal article supplement (PMC8211562; doi:10.1038/s41388-021-01842-1), 2021-06-02

## Supplementary Figure 8

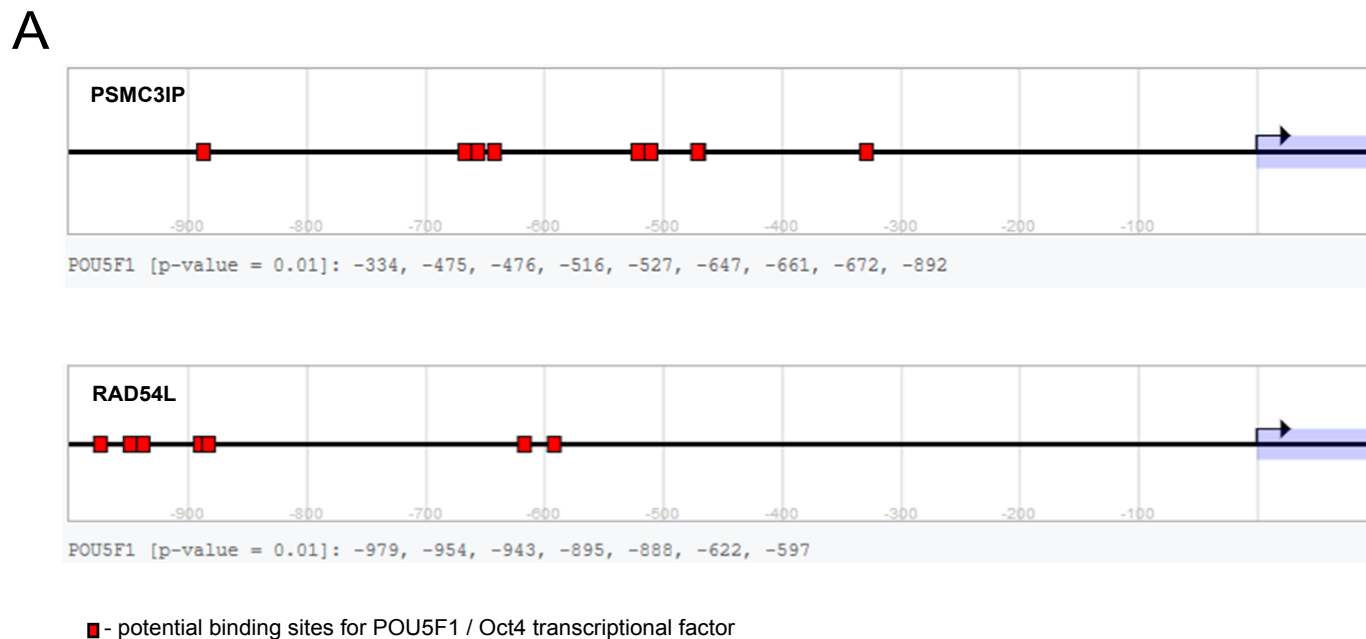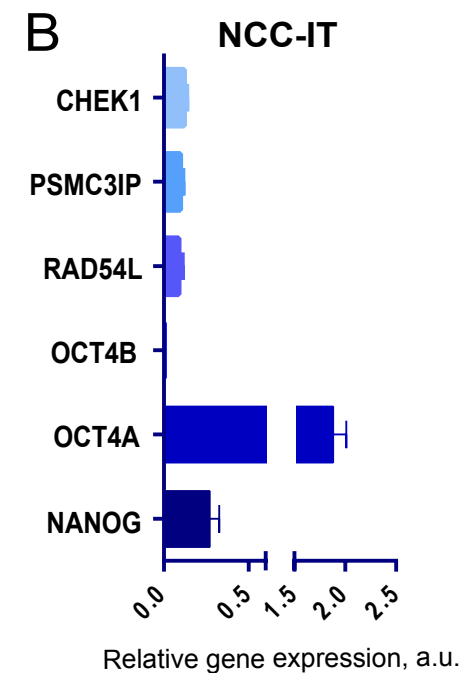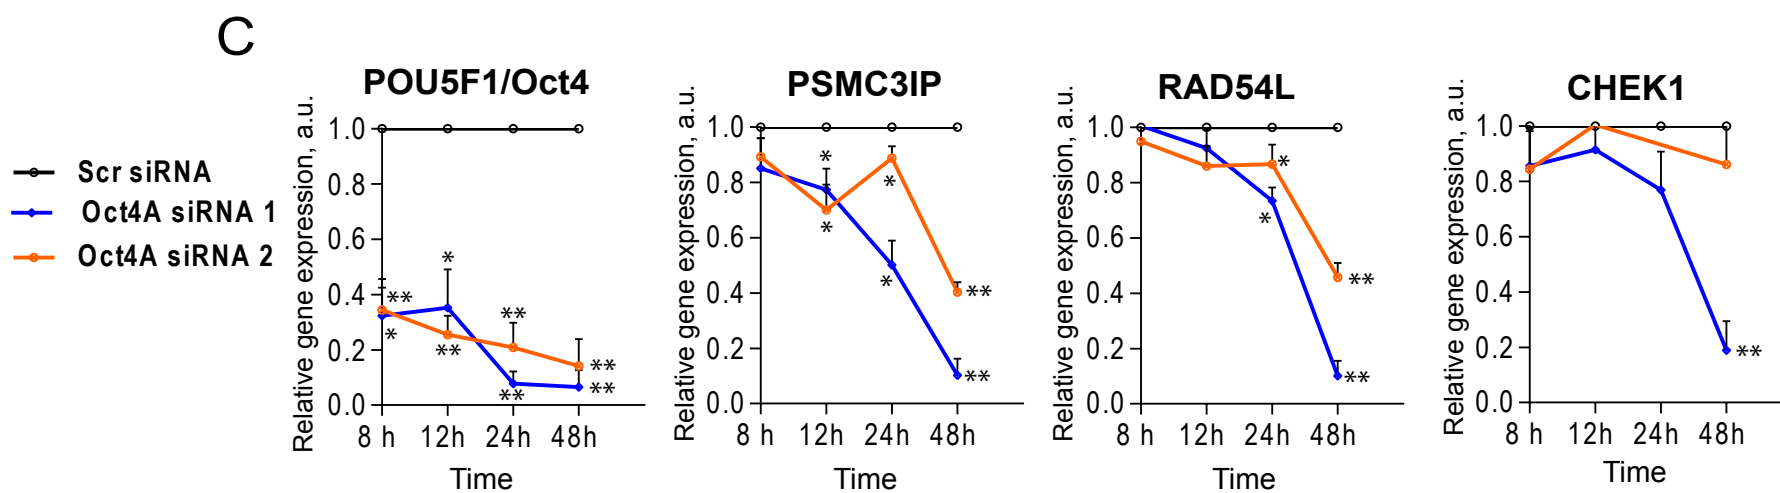

Supplement: 41388_2021_1842_MOESM11_ESM.pdf [file 41388_2021_1842_MOESM11_ESM.pdf]
