# Supplementary material for: Oct4 confers stemness and radioresistance to head and neck squamous cell carcinoma by regulating the homologous recombination factors PSMC3IP and RAD54L
Source: PubMed Central journal article supplement (PMC8211562; doi:10.1038/s41388-021-01842-1), 2021-06-02

# Supplementary Figure 9

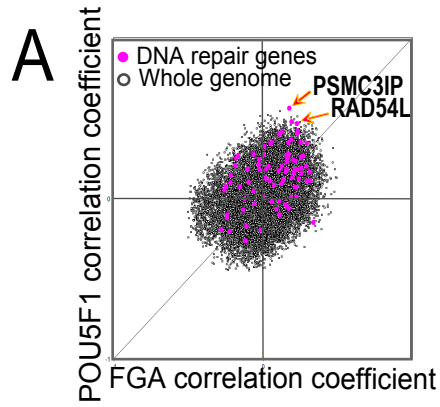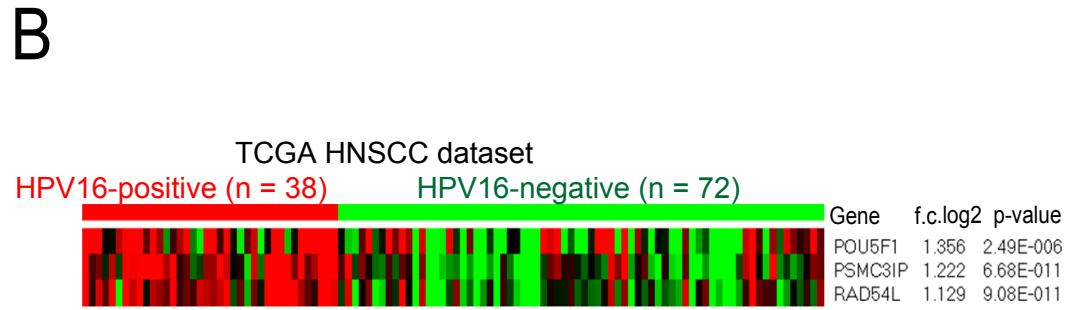

# C

TCGA HNSCC dataset, Radiotherapy-treated HPV16-negative patients; DNA repair gene expression: died (n = 6) vs. survived (n=7)

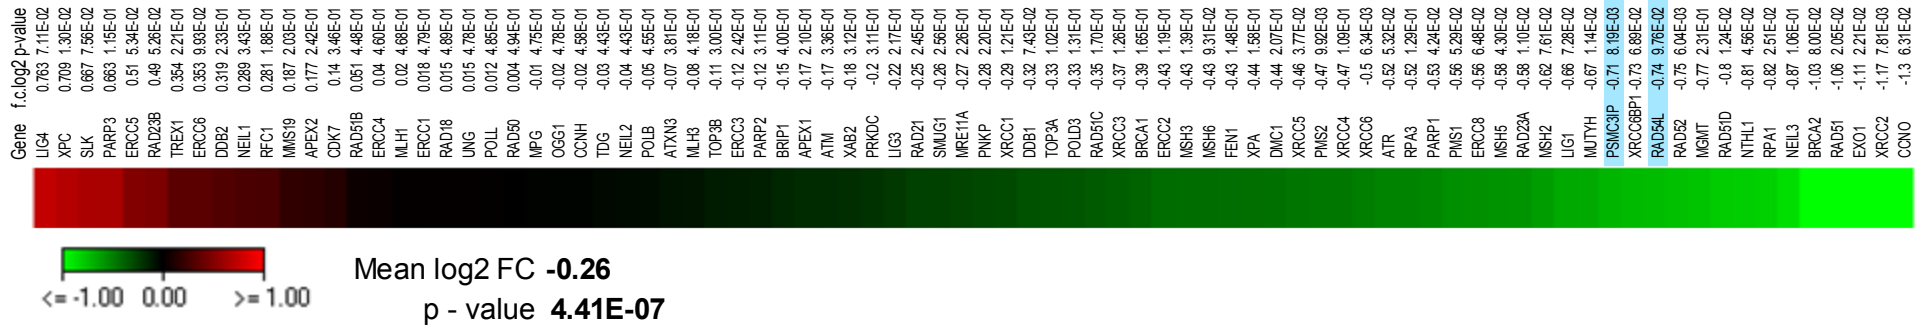

Supplement: 41388_2021_1842_MOESM12_ESM.pdf [file 41388_2021_1842_MOESM12_ESM.pdf]
